# Supplementary material
Source: publisher figshare collection journal article supplement (https://acs.figshare.com/ndownloader/files/6685035)
Supplement: Supplementary file 1 [file 6685035]

# Supporting Information

## **Bandgap- and Local Field-Dependent Photoactivity of Ag/Black Phosphorus Nanohybrids**

Wanying Lei<sup>†,‡,§</sup>, Tingting Zhang<sup>†</sup>, Ping Liu<sup>\*,†</sup>, José A. Rodríguez<sup>†</sup>, Gang Liu<sup>\*,†</sup>

and Minghua Liu<sup>\*,†</sup>

<sup>†</sup>CAS Key Laboratory of Standardization and Measurement for Nanotechnology, CAS Center for Excellence in Nanoscience, National Center for Nanoscience and Technology, Beijing 100190, People's Republic of China

<sup>‡</sup>Academy for Advanced Interdisciplinary Studies, Peking University, Beijing 100871, People's Republic of China

<sup>§</sup>University of Chinese Academy of Sciences, Beijing 100049, People's Republic of China

<sup>†</sup>Chemistry Department, Brookhaven National Laboratory, Upton, NY 11973, United States

**Table S1.** Calculated adsorption energy  $E_{\text{ads}}$  (eV), Ag-P bond length  $d_{\text{Ag-P}}$  (Å) and average charge  $q_{\text{Ag}}$  of Ag (e) for Ag/P(010) tetralayer as a function of Ag coverage ( $\theta$ )

| $\theta$ (ML) | $E_{\text{ads}}$ (eV/Ag atom) | $d_{\text{Ag-P}}$ (Å) | $q_{\text{Ag}}$ (e/Ag atom) |
|---------------|-------------------------------|-----------------------|-----------------------------|
| 1/4           | -1.11                         | 2.41                  | 0.16                        |
| 1/2           | -1.35                         | 2.51                  | 0.05                        |
| 1             | -2.02                         | 2.55                  | 0.04                        |
| 2             | -2.30                         | 2.57                  | 0.00                        |

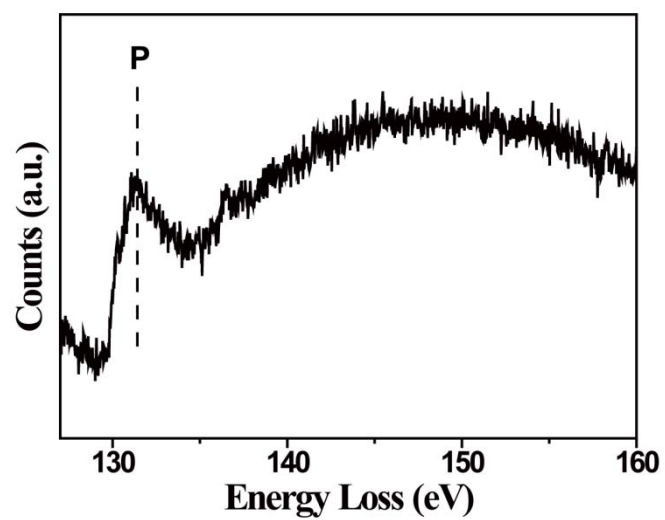

**Figure S1.** EELS spectrum of BP nanosheets.

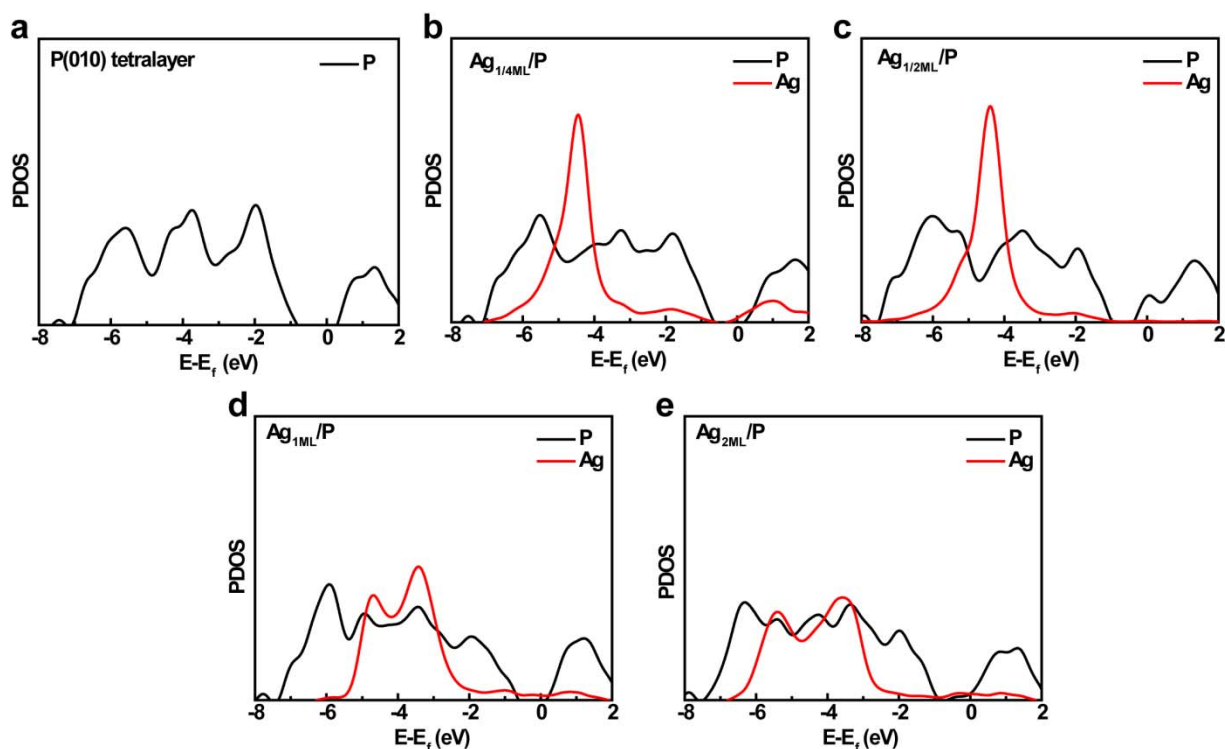

**Figure S2.** PDOS of Ag and P for Ag adsorption on a P(010) tetralayer. (a) P (010) tetralayer, (b) Ag<sub>0.25ML</sub>/P, (c) Ag<sub>0.5 ML</sub>/P, (d) Ag<sub>1 ML</sub>/P, and (e) Ag<sub>2 ML</sub>/P.

To gain additional information about the interfacial interactions between Ag adlayers and BP support, PDOS were calculated (Figure S2). Both VB and CB of BP are mainly composed of P 2p states. In the range of Ag coverages (0.25-2 ML), Ag states mix with P 2p states. At low coverage (0.25 ML), Ag 4d states are localized and the ionic bond is formed between Ag 4d and P 2p. With the increasing Ag coverage up to 1-2 ML, Ag 4d states are more delocalized and hybridized with P 2p states. In other words, the covalent bond between Ag 4d and P 2p appears due to the populated Ag-Ag interactions. As a result, the metallic Ag becomes dominant.

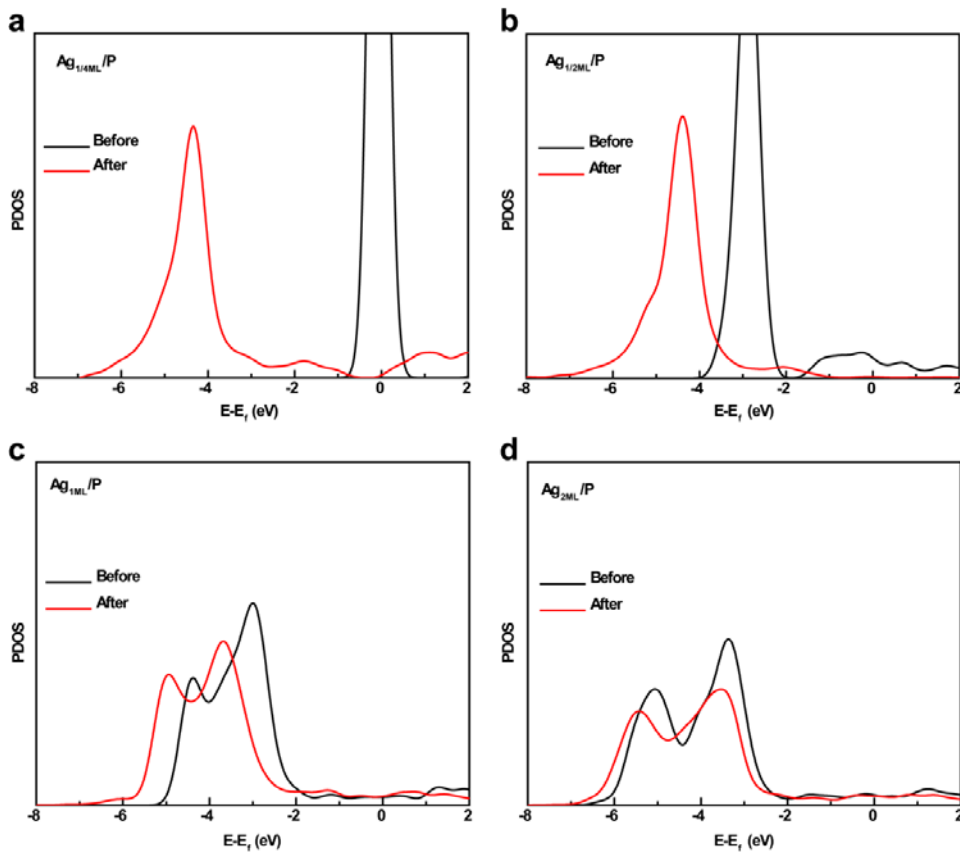

**Figure S3.** PDOS of Ag adlayers before and after deposition on a P(010) tetralayer.

Figure S3 displays that for gas-phase Ag nanostructures, the corresponding Ag PDOS is shifted downwards with increasing Ag content and Ag-Ag bond formation together with a peak broadening, indicating the presence of electron delocalization. When deposited onto BP, the Ag PDOS is dependent on the Ag coverage. At low Ag coverage (0.25 ML), the Ag-BP interaction leads to a significant down-shift by  $\sim 4.5$  eV and the peak is broadened. In this case, the ionic bond is formed between Ag 4d and P 2p, resulting in the oxidation of Ag. Such effect is weakened when the coverage increases to 0.5 ML and the Ag-Ag bonds start to form, where the peak down-shift is only  $\sim 1.5$  eV. In the range of 1-2 ML coverages, it becomes less pronounced with the further increase in Ag-Ag bond formation. The profile of Ag PDOS only changes slightly upon interaction with BP and the associated down-shift in PDOS decreases to  $\sim 0.5$  eV at 1 ML and  $\sim 0.2$  eV at 2 ML, respectively. Apparently, the covalent nature appears and dominates at the Ag-BP interface.

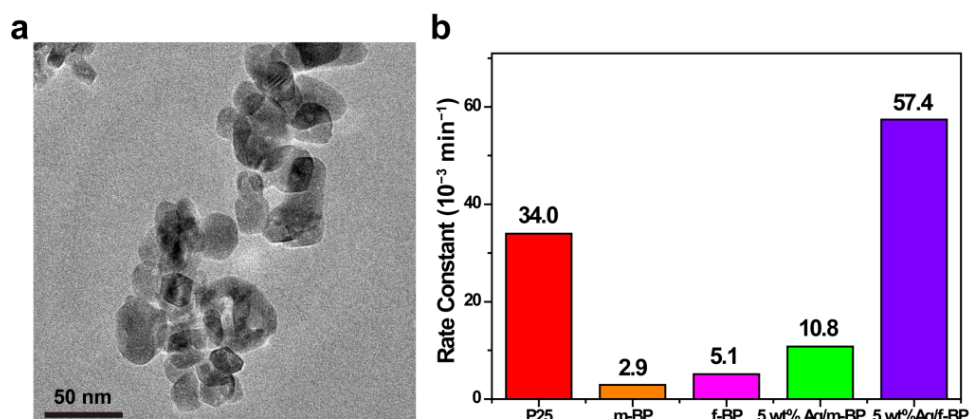

**Figure S4.** (a) Typical TEM image of P25. (b) Photoactivity of P25, m-BP, f-BP, 5 wt% Ag/m-BP and 5 wt% Ag/f-BP samples.

Figure S4a is a typical TEM image of P25, showing the particle size is about 20-30 nm. And the photoactivity is displayed in Figure S4b. The reaction rate constant of P25 is  $34.0 \times 10^{-2} \text{ min}^{-1}$ , which is 11.7-fold, 6.7-fold and 3.1-fold larger than that of m-BP, f-BP, 5 wt% Ag/m-BP, respectively. However, the reaction rate of 5 wt% Ag/f-BP is  $57.4 \times 10^{-2} \text{ min}^{-1}$ , 1.6-fold larger than that of P25.

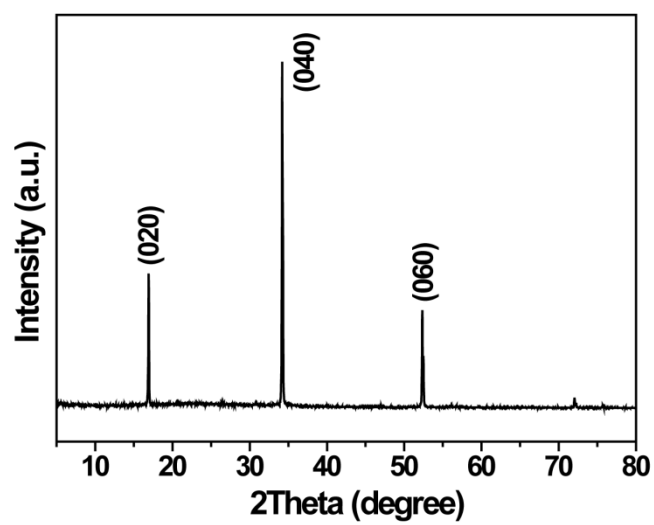

**Figure S5.** XRD patterns of bulk-like BP crystals.
